# Supplementary material for: In situ switching layer-by-layer assembly: one-pot rapid layer assembly via alternation of reductive and oxidative electropolymerization
Source: Royal Society of Chemistry journal article supplement (doi:10.1039/c3cc43629b), 2013-01-01
Supplement: c3cc43629b.pdf [file c3cc43629b.pdf]

## Supporting Information

### **In Situ Switching Layer-by-Layer Assembly: One-Pot Rapid Layer Assembly via Alternation of Reductive and Oxidative Electropolymerizations**

Mao Li, Jian Zhang, Hai-Jing Nie, Meiyong Liao, Liwen Sang,

Wenqiang Qiao, Zhi Yuan Wang, Yuguang Ma, Yu-Wu Zhong,

Katsuhiko Ariga

## 1. Materials

TBAPF<sub>6</sub> (tetrabutylammonium hexafluorophosphate), indium tin oxide (ITO) (8-12 Ω/□), dichlorobenzene and acetonitrile were purchased from Aldrich Chemical Co. DvRu complex and CsF were synthesized as described in our previous papers.<sup>S1</sup>

## 2. General techniques

Electronic absorption spectra were measured using a Shimadzu UV-3600 UV/Vis/NIR spectrophotometer. AFM images were obtained with a commercial AFM unit (SPA400-SPI4000, Seiko Instruments Inc., Chiba, Japan). AFM images were taken in dynamic force mode (DFM, i.e., tapping mode) at optimal force. Fluorescence measurements are carried out with RF-5301PC. The switching photocurrent-time (I-t) characteristics were measured using a two-point probe method in air using an Advantest picoammeter (R8340A) and dc voltage source (R6144). A 500W Ushio xenon lamp and an Acton Research monochromator with order sorting filters were used to obtain the monochromator light (0.5 mW/cm<sup>2</sup> at 360 nm and 1.0 mW/cm<sup>2</sup> at 450 nm).

## 3. Electrochemical experiments

For electrochemical experiments, the supporting electrolyte TBAPF<sub>6</sub> (tetrabutylammonium hexafluorophosphate) was dried for 24 h at 80 °C under vacuum before use. Cyclic voltammetry (CV) experiments were performed using a typical one-compartment, three-electrode electrochemical cell driven by a CHI Model

630B electrochemical analyzer. In all cases, Ag/0.01M AgNO<sub>3</sub> ( $E_{1/2} = 0.26$  V vs Fc/Fc<sup>+</sup>) was used as reference. Indium tin oxide (ITO) (8-12 Ω/□, Aldrich) (deposition area: ~ 1.0 cm<sup>2</sup>) was used as working electrode; the counter electrode was a gold foil (area: ~ 2.0 cm<sup>2</sup>). After electrochemical processes, the resulting films were rinsed with CH<sub>2</sub>Cl<sub>2</sub> to remove any unreacted precursors.

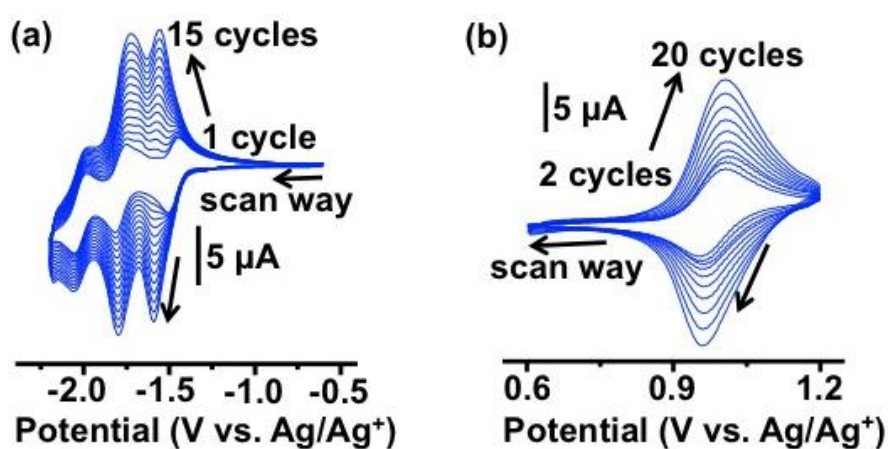

**Figure S1.** Reductive electropolymerization of DvRu at cathodic scan and its CV of poly[Csf] film at anodic scan.

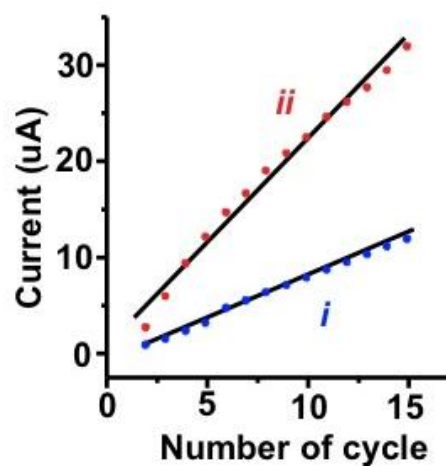

**Figure S2.** Layer number dependence of the oxidation currents of (i) poly[DvRu] film at 1.6 V and (ii) poly[CsF] film at 0.7 V.

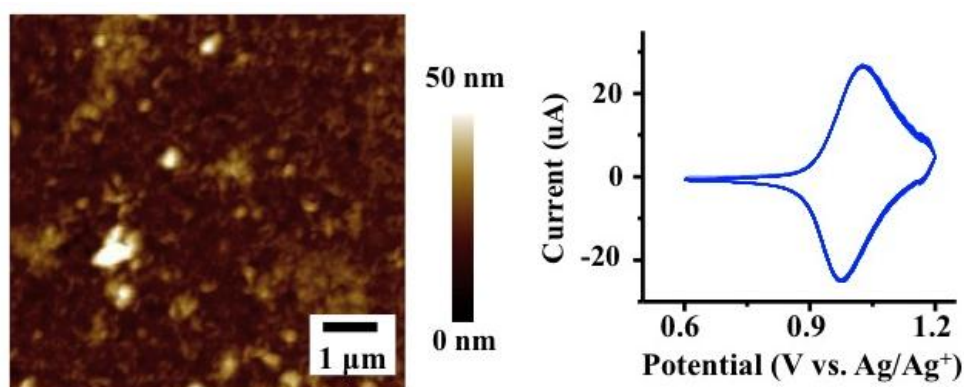

**Figure S3.** AFM image of poly[DvRu] film prepared at 100 mV/s and its CV in monomer free electrolyte on Pt electrode at 200 mV/s for 100 cycles.

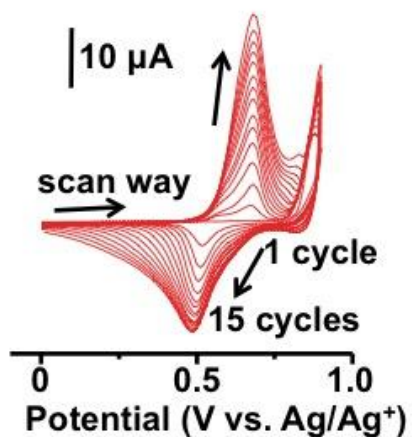

**Figure S4.** Oxidative electropolymerization of CsF at anodic scan.

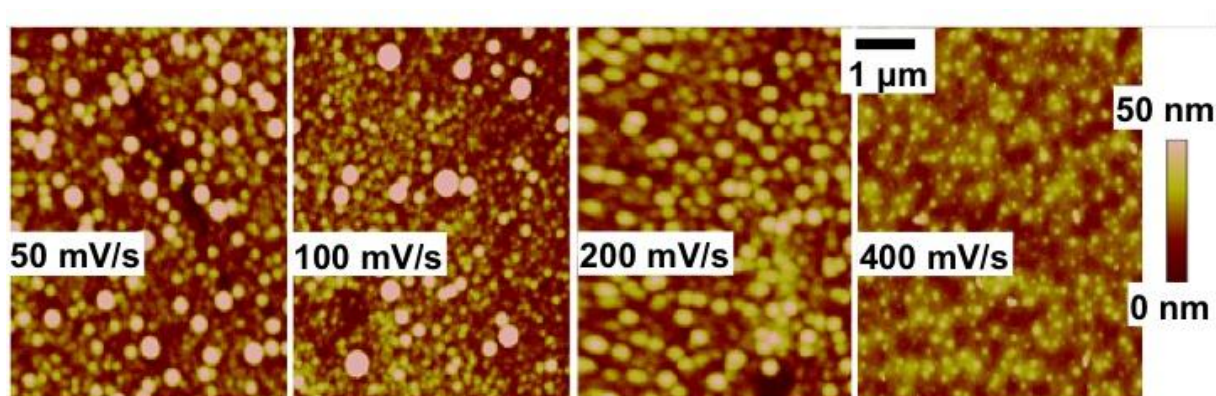

**Figure S5.** AFM images of poly[CsF] films prepared by using different scan rates.

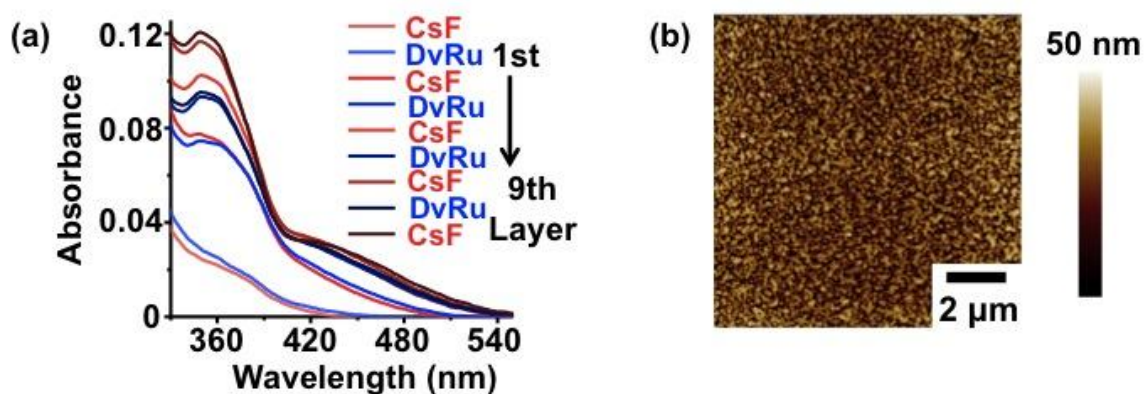

**Figure S6.** (a) UV-vis spectra of poly[CsF]/poly[DvRu] multilayer and (b) AFM image of multilayer.

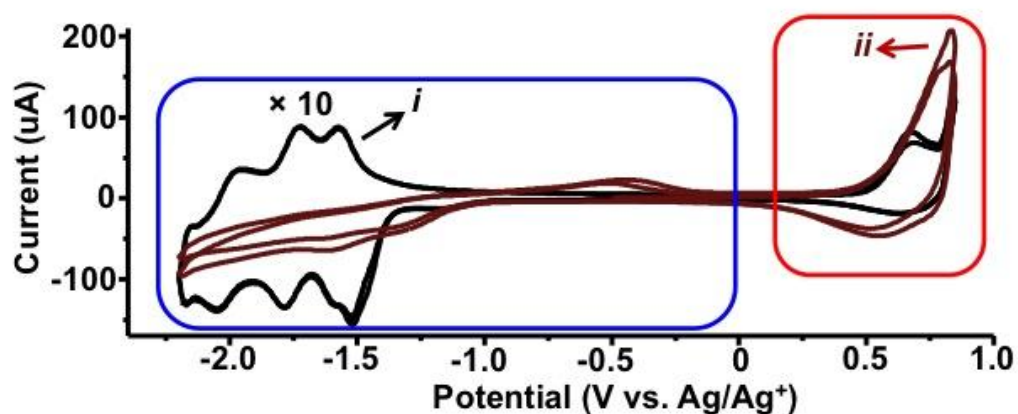

**Figure S7.** CV of multilayer films prepared by (i) CV mode on Pt (the intensity was magnified 10 times) and (ii) potential step switching mode on ITO

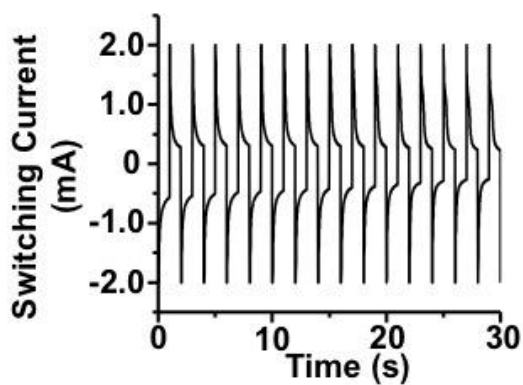

**Figure S8.** Switching current of ITO with applying step potentials at -2.2 and 0.85 V with an interval of 1s.

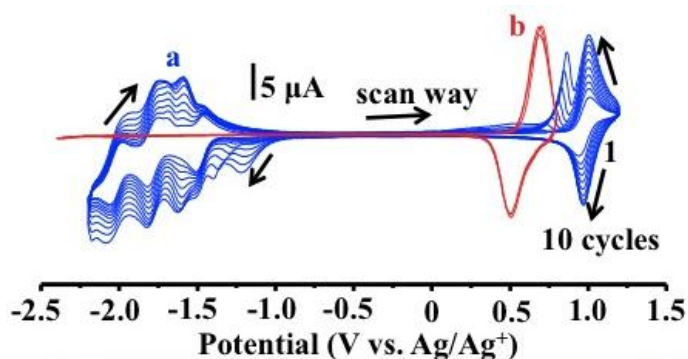

**Figure S9.** (A) Cyclic voltammogram of poly[DvRu] film on Pt electrode for 10 cycles. (B) Cyclic voltammogram of poly[CsF] film on Pt electrode in monomer free electrolyte.

The poly[DvRu] film shows sharp prewaves at 0.75 and -1.2 V, the magnitude of which spikes depends on electrode history and disappears when the potential sweeps between only negative (-0.6 ~ -2.2 V) or positive (0.9~1.2 V) potential (**Figure S1**) for multicycles. The prewaves are indicative of charges trapped in the film that are discharged as the film starts to be doped.

## Reference

- S1.** a) H. J. Nie, J. Y. Shao, J. Wu, J. Yao, Y. W. Zhong, *Organometallics* **2012**, *31*, 6952–6959; b) M. Li, S. Tang, F. Shen, M. Liu, W. Xie, H. Xia, L. Liu, L. Tian, Z. Xie, P. Lu, M. Hanif, D. Lu, G. Cheng, Y. G. Ma, *Chem. Commun.* **2006**, 3393–3395.
